# Supplementary material for: Multivariate Chemometric Comparison of Forced Degradation and Electrochemical Oxidation LC–MS Profiles of Maraviroc
Source: MDPI journal article supplement (doi:10.3390/molecules28031195), 2023-01-25
Supplement: s1 [file s1]

*Supplementary Materials*

## **Multivariate Chemometric Comparison of Forced Degradation and Electrochemical Oxidation LC–MS Profiles of Maraviroc**

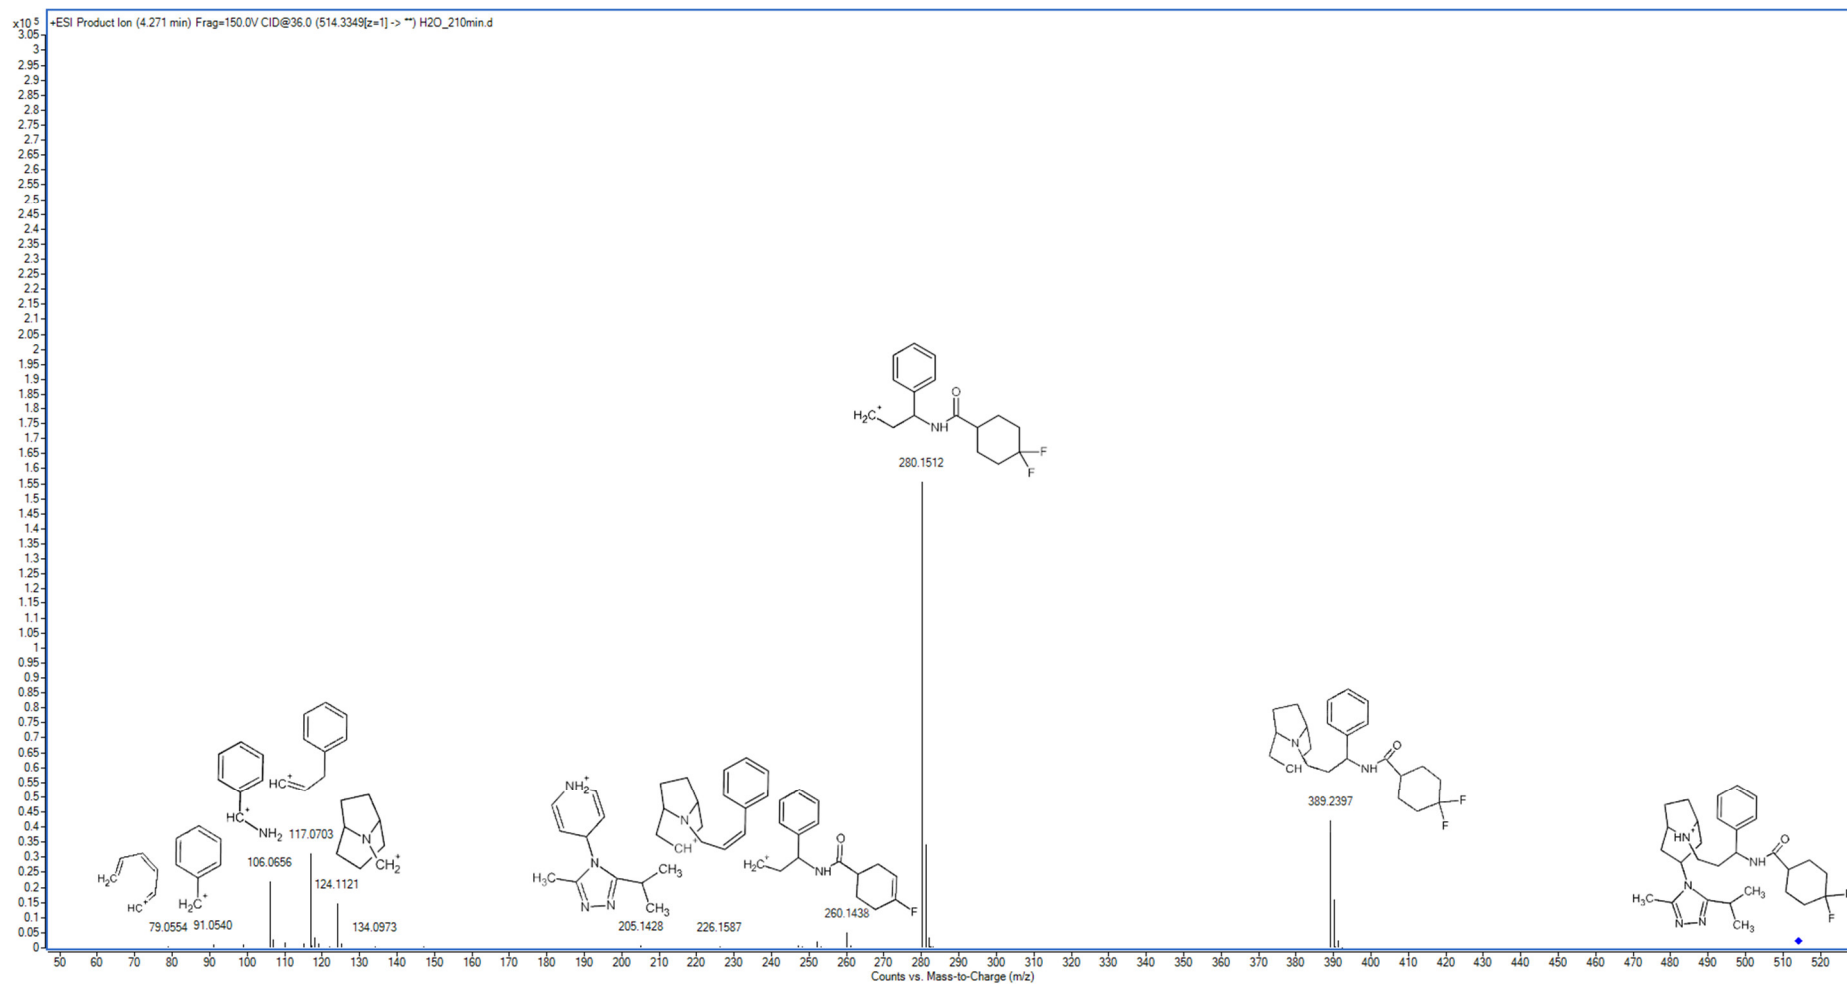

Figure S1. MS/MS spectrum and fragmentation pattern of single-charged maraviroc.

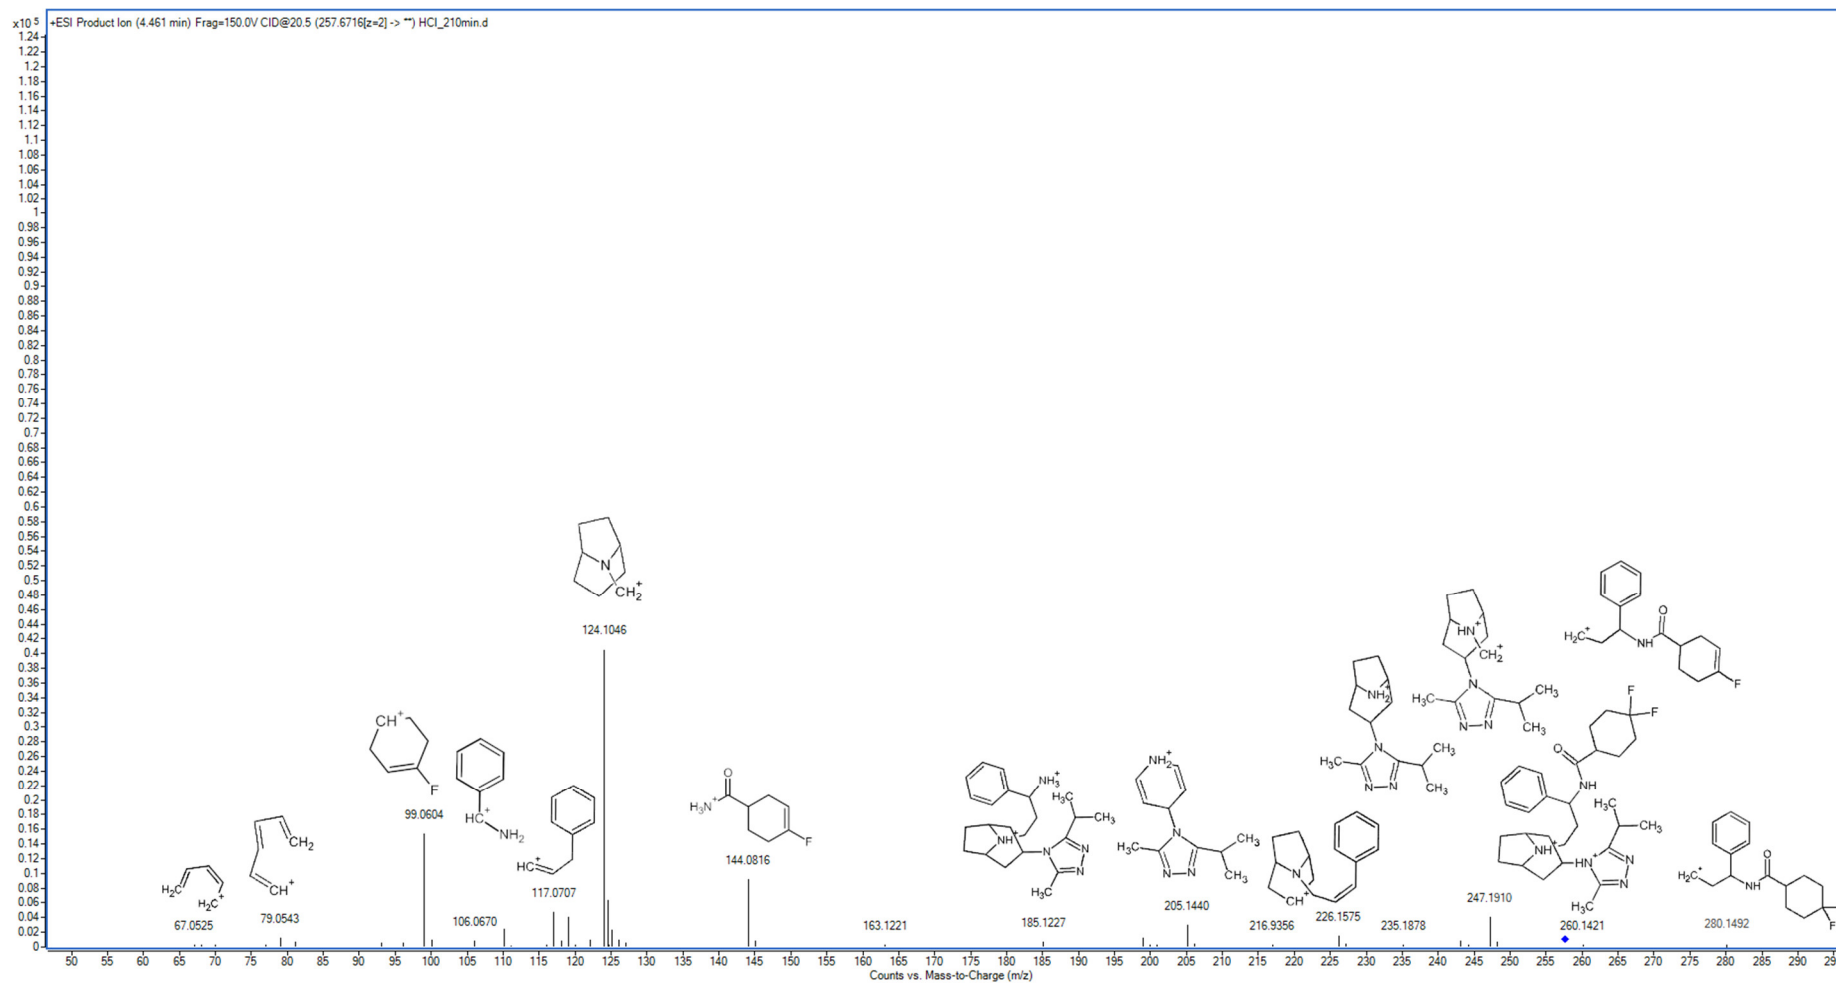

Figure S2. MS/MS spectrum and fragmentation pattern of double-charged maraviroc.

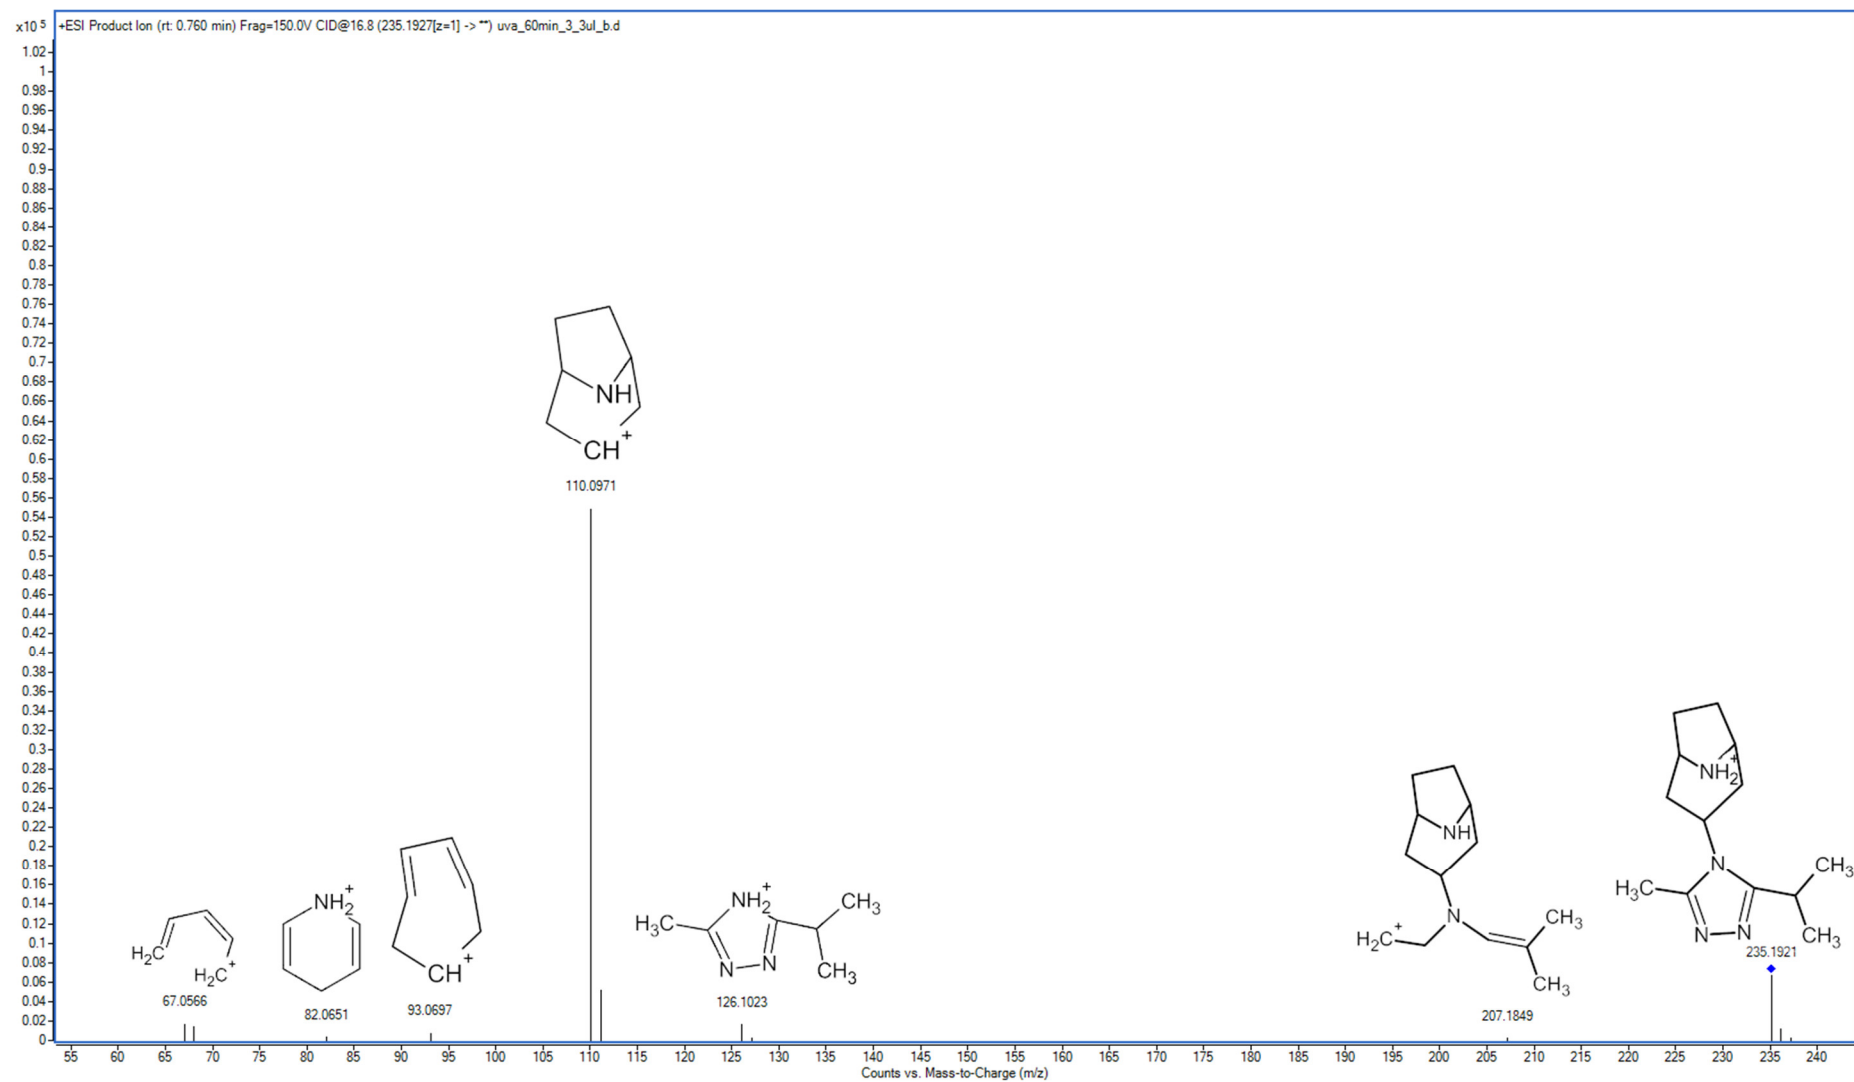

Figure S3. MS/MS spectrum and fragmentation pattern of TP1 metabolite.

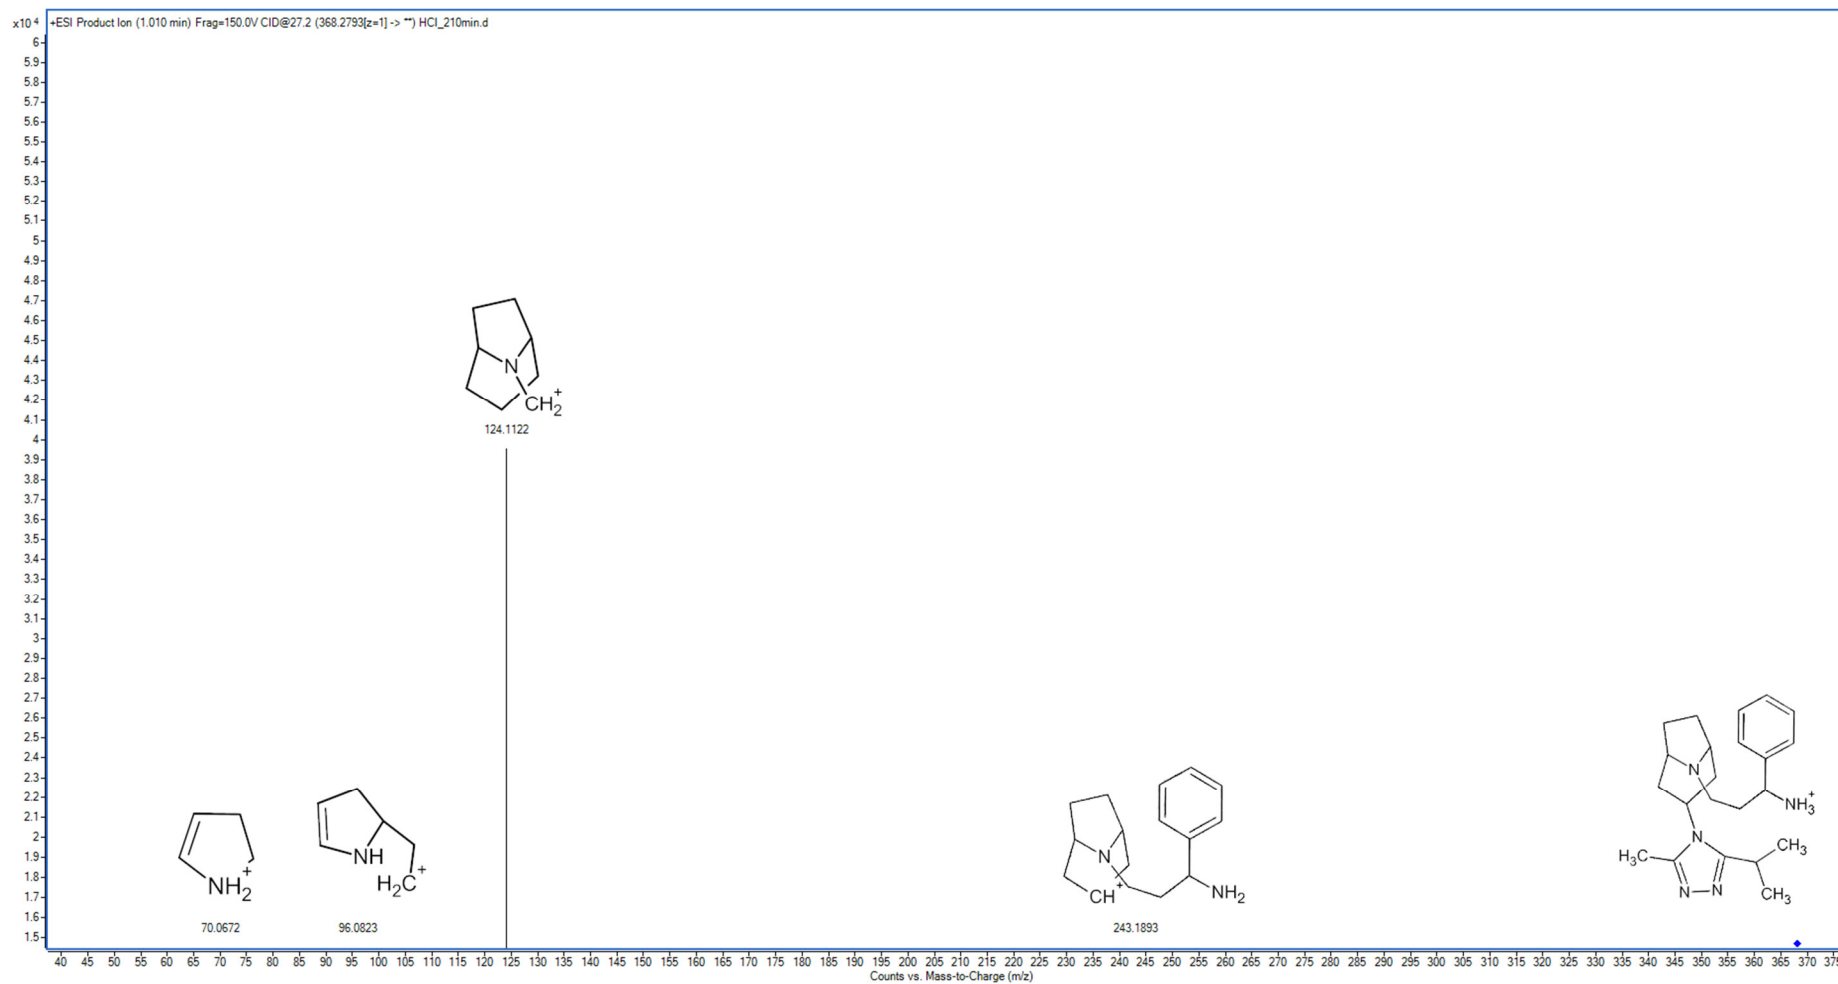

Figure S4. MS/MS spectrum and fragmentation pattern of TP2 metabolite.

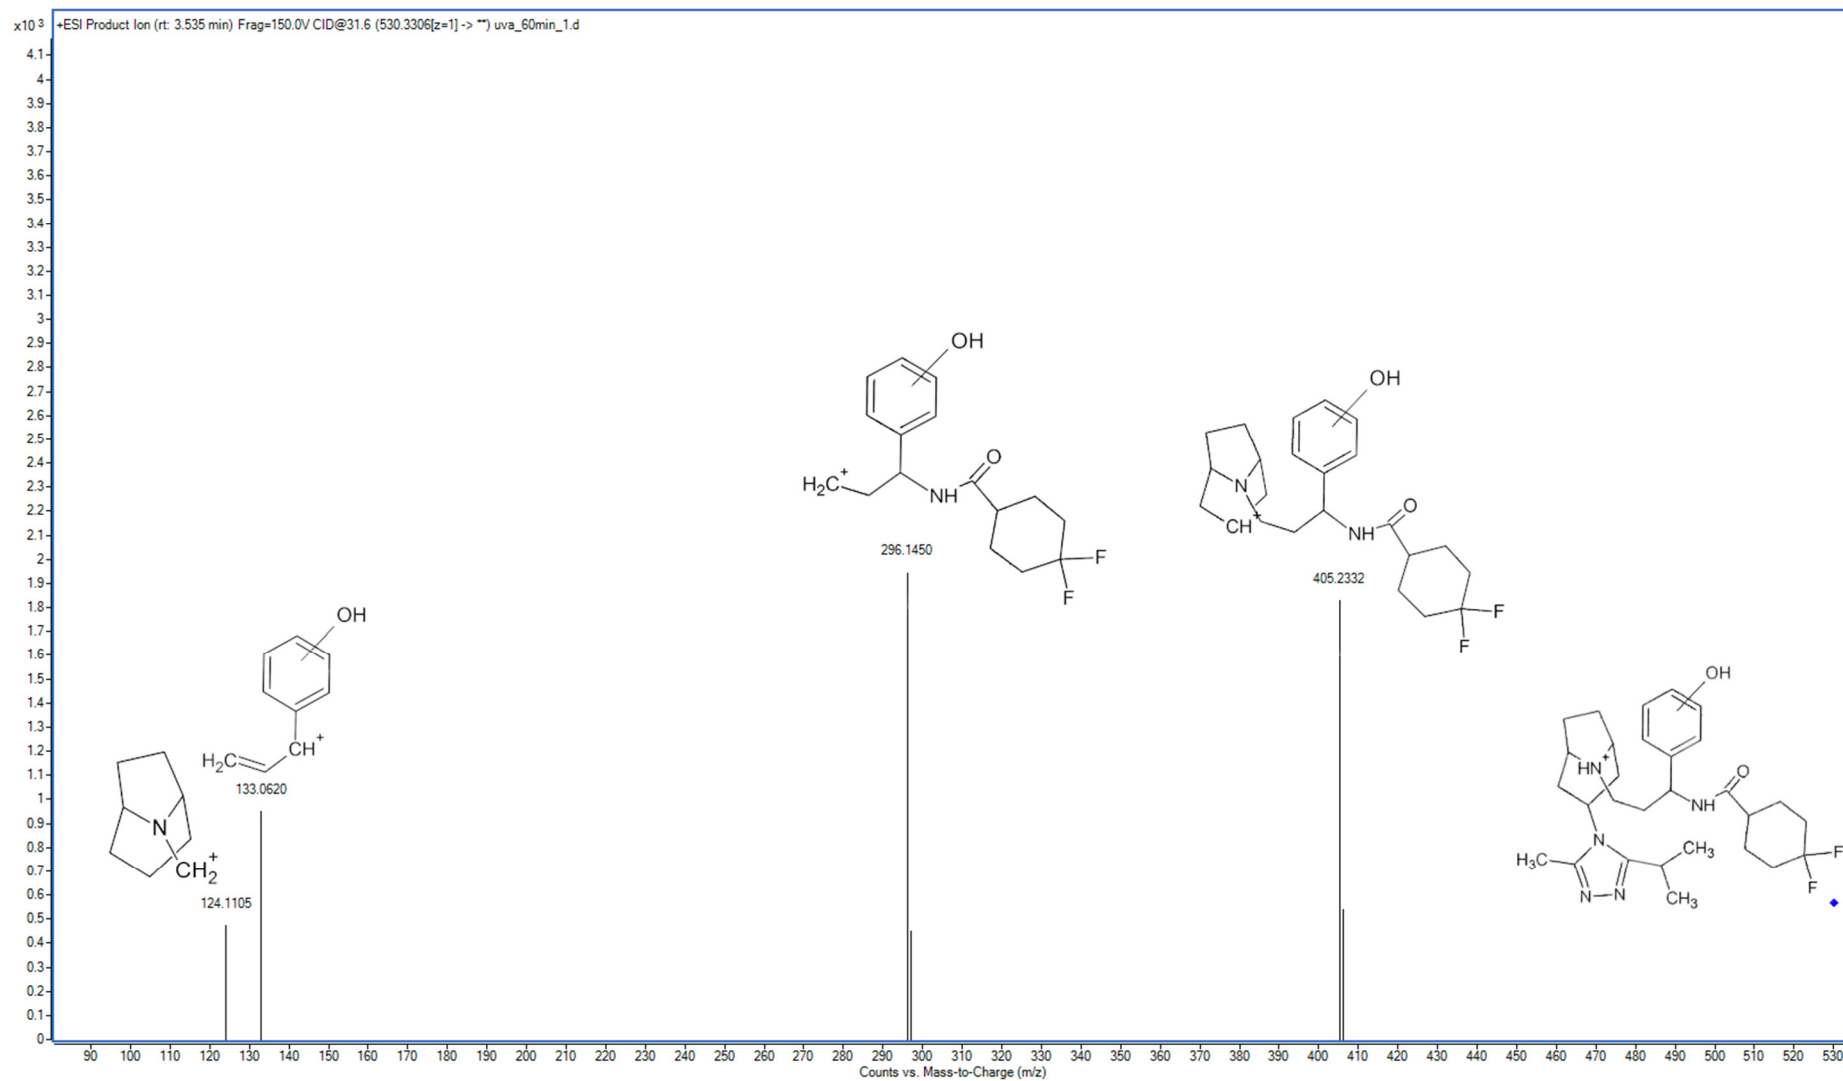

Figure S5. MS/MS spectrum and fragmentation pattern of single-charged TP3.

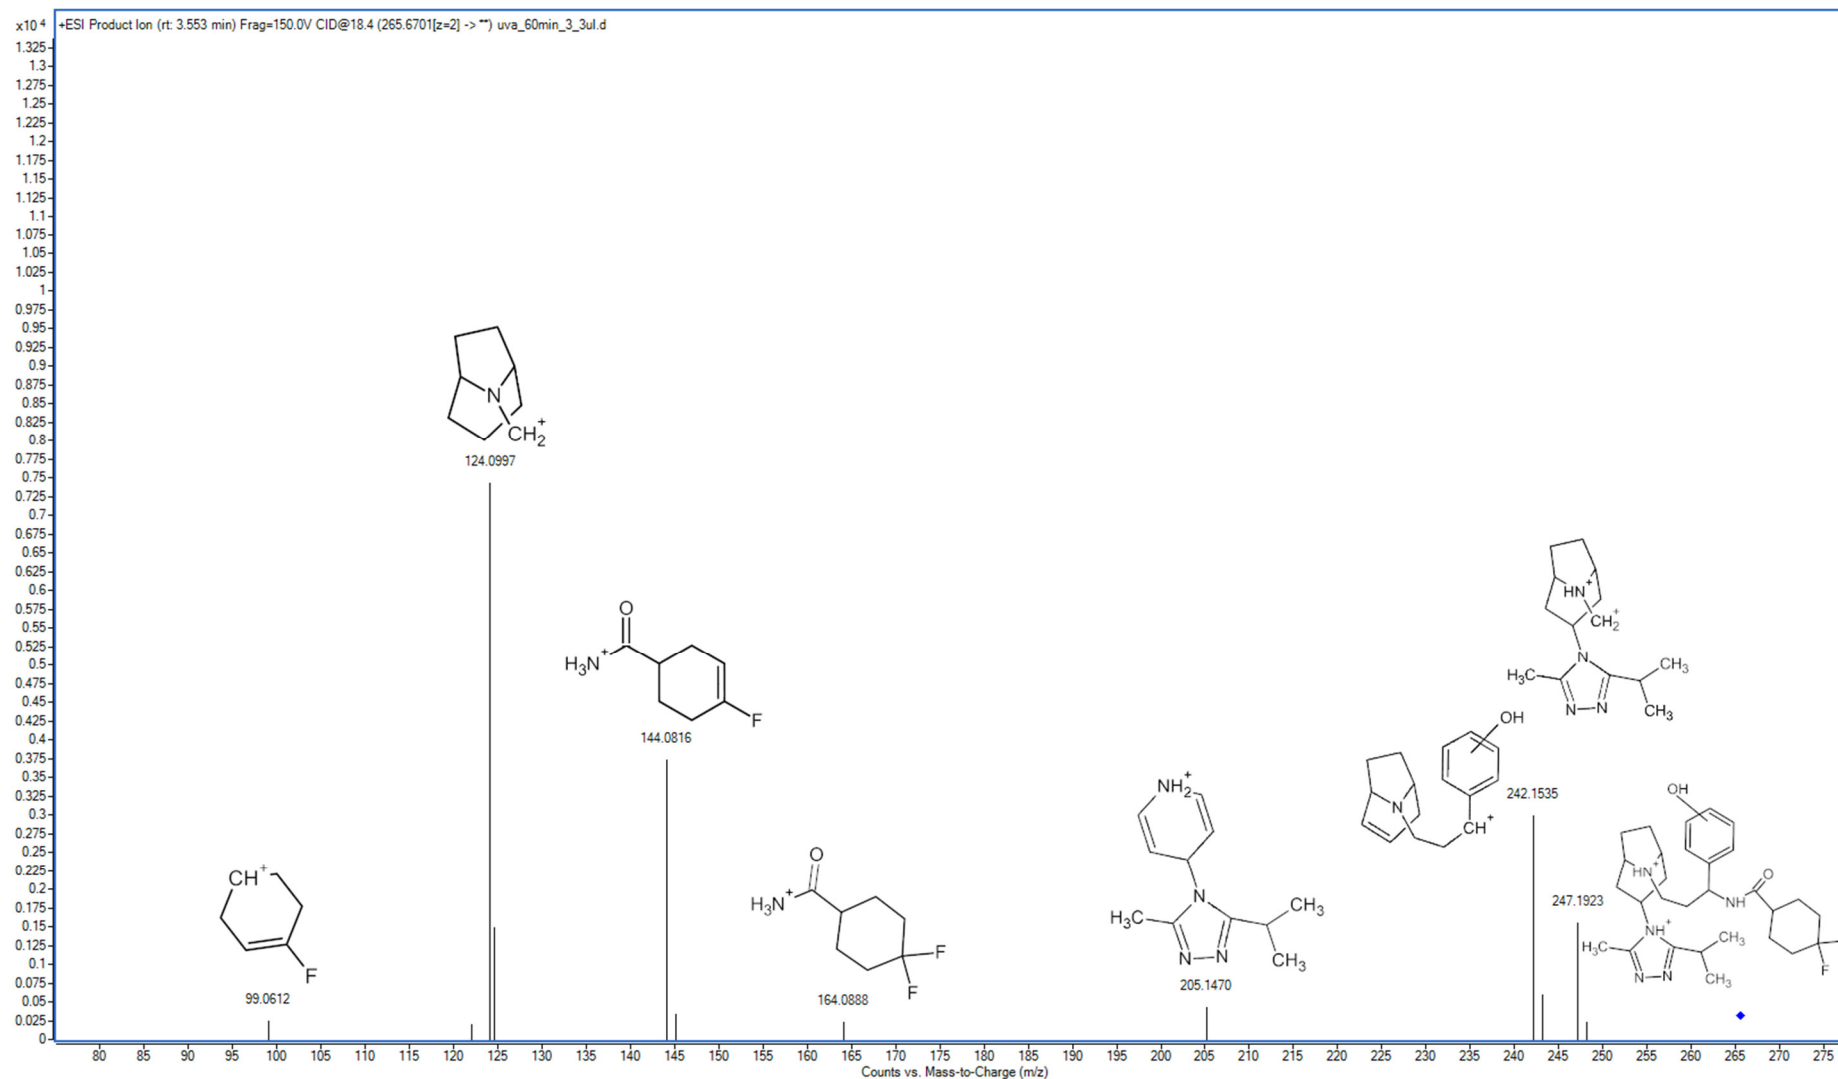

Figure S6. MS/MS spectrum and fragmentation pattern of double-charged TP3.

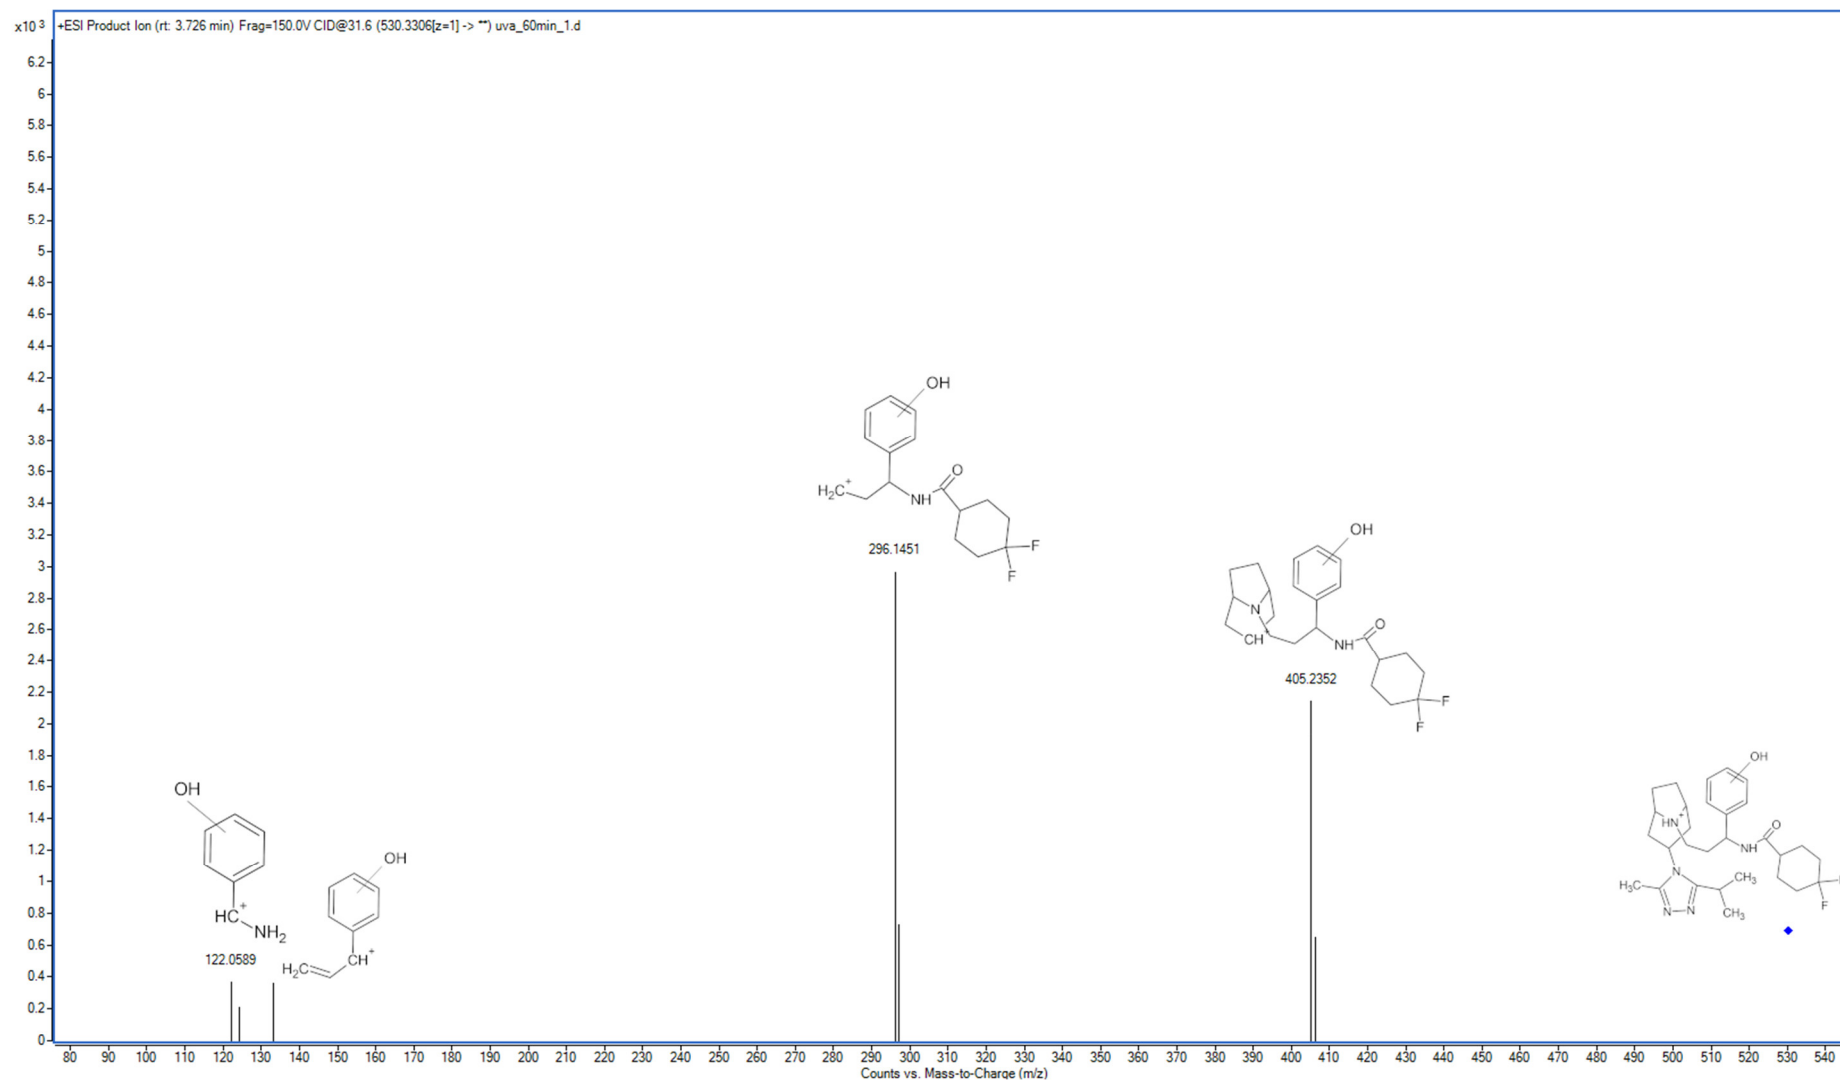

Figure S7. MS/MS spectrum and fragmentation pattern of single-charged TP4.



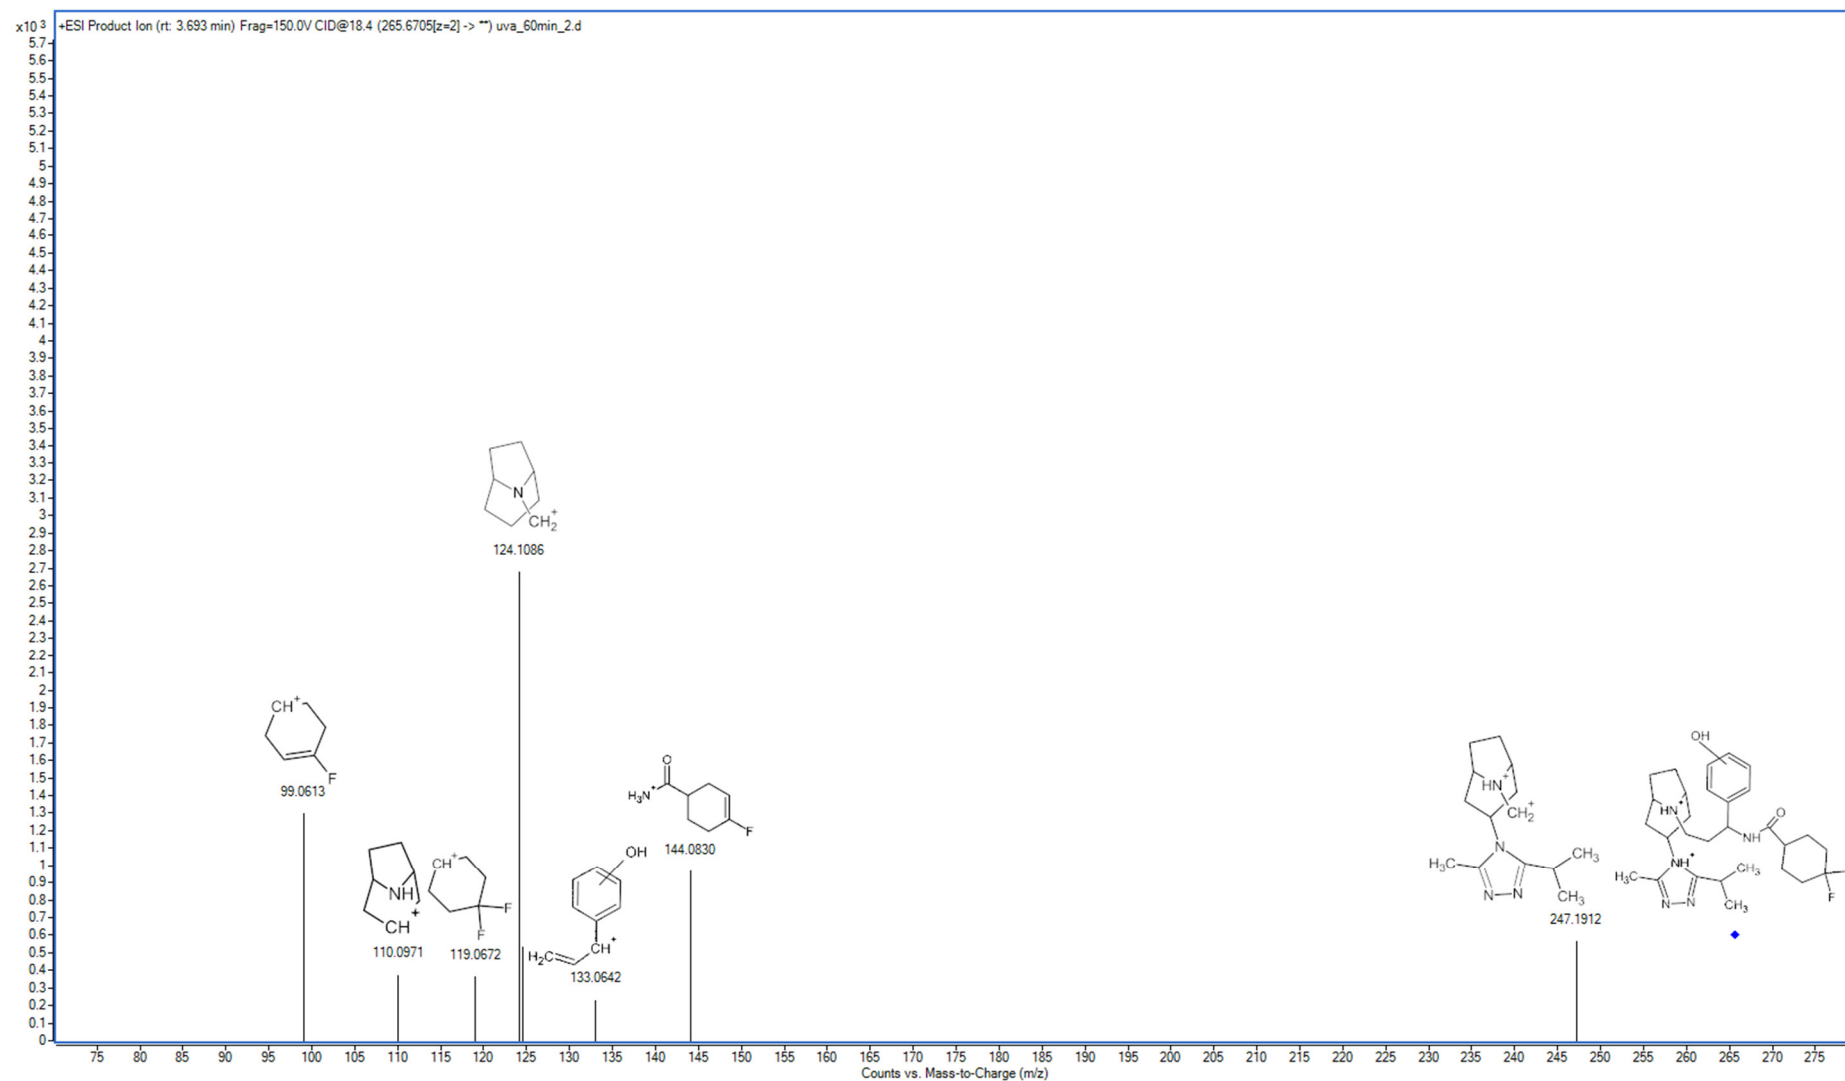

Figure S8. MS/MS spectrum and fragmentation pattern of double-charged TP4.

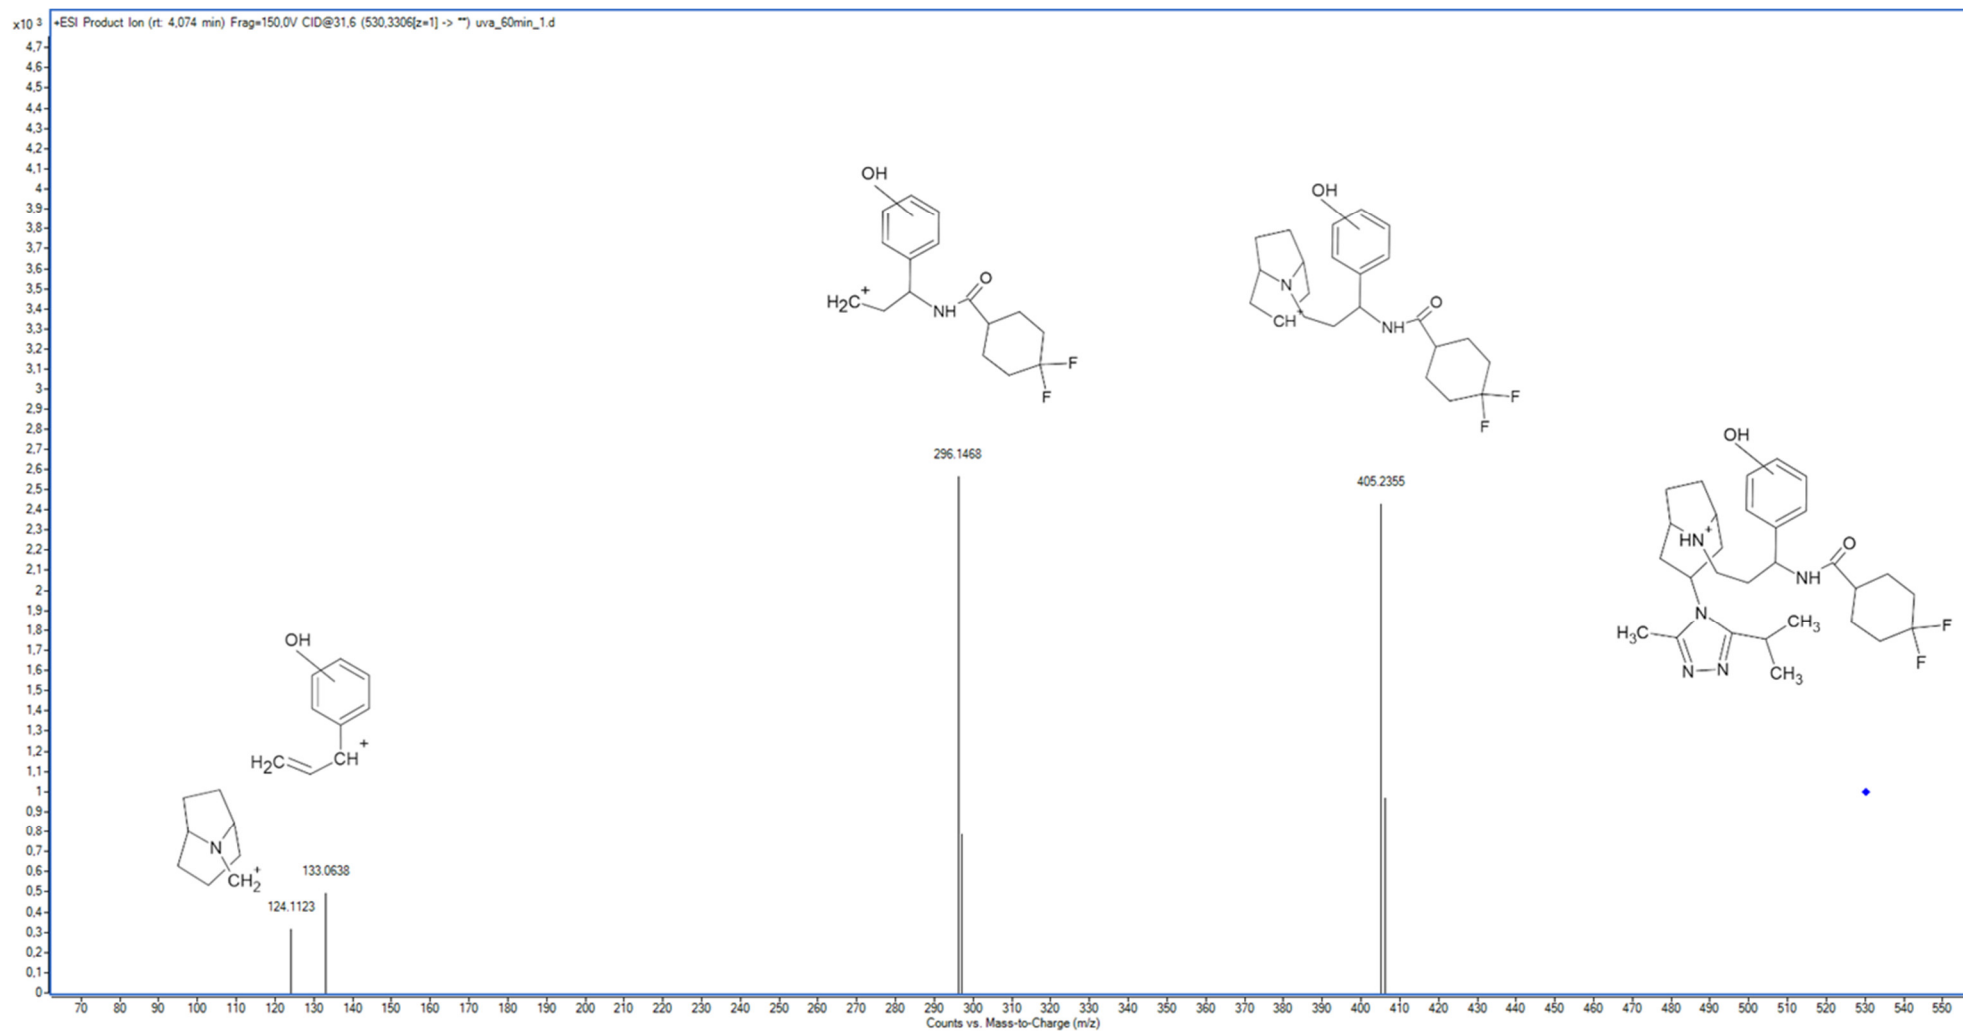

Figure S9. MS/MS spectrum and fragmentation pattern of single-charged TP5.

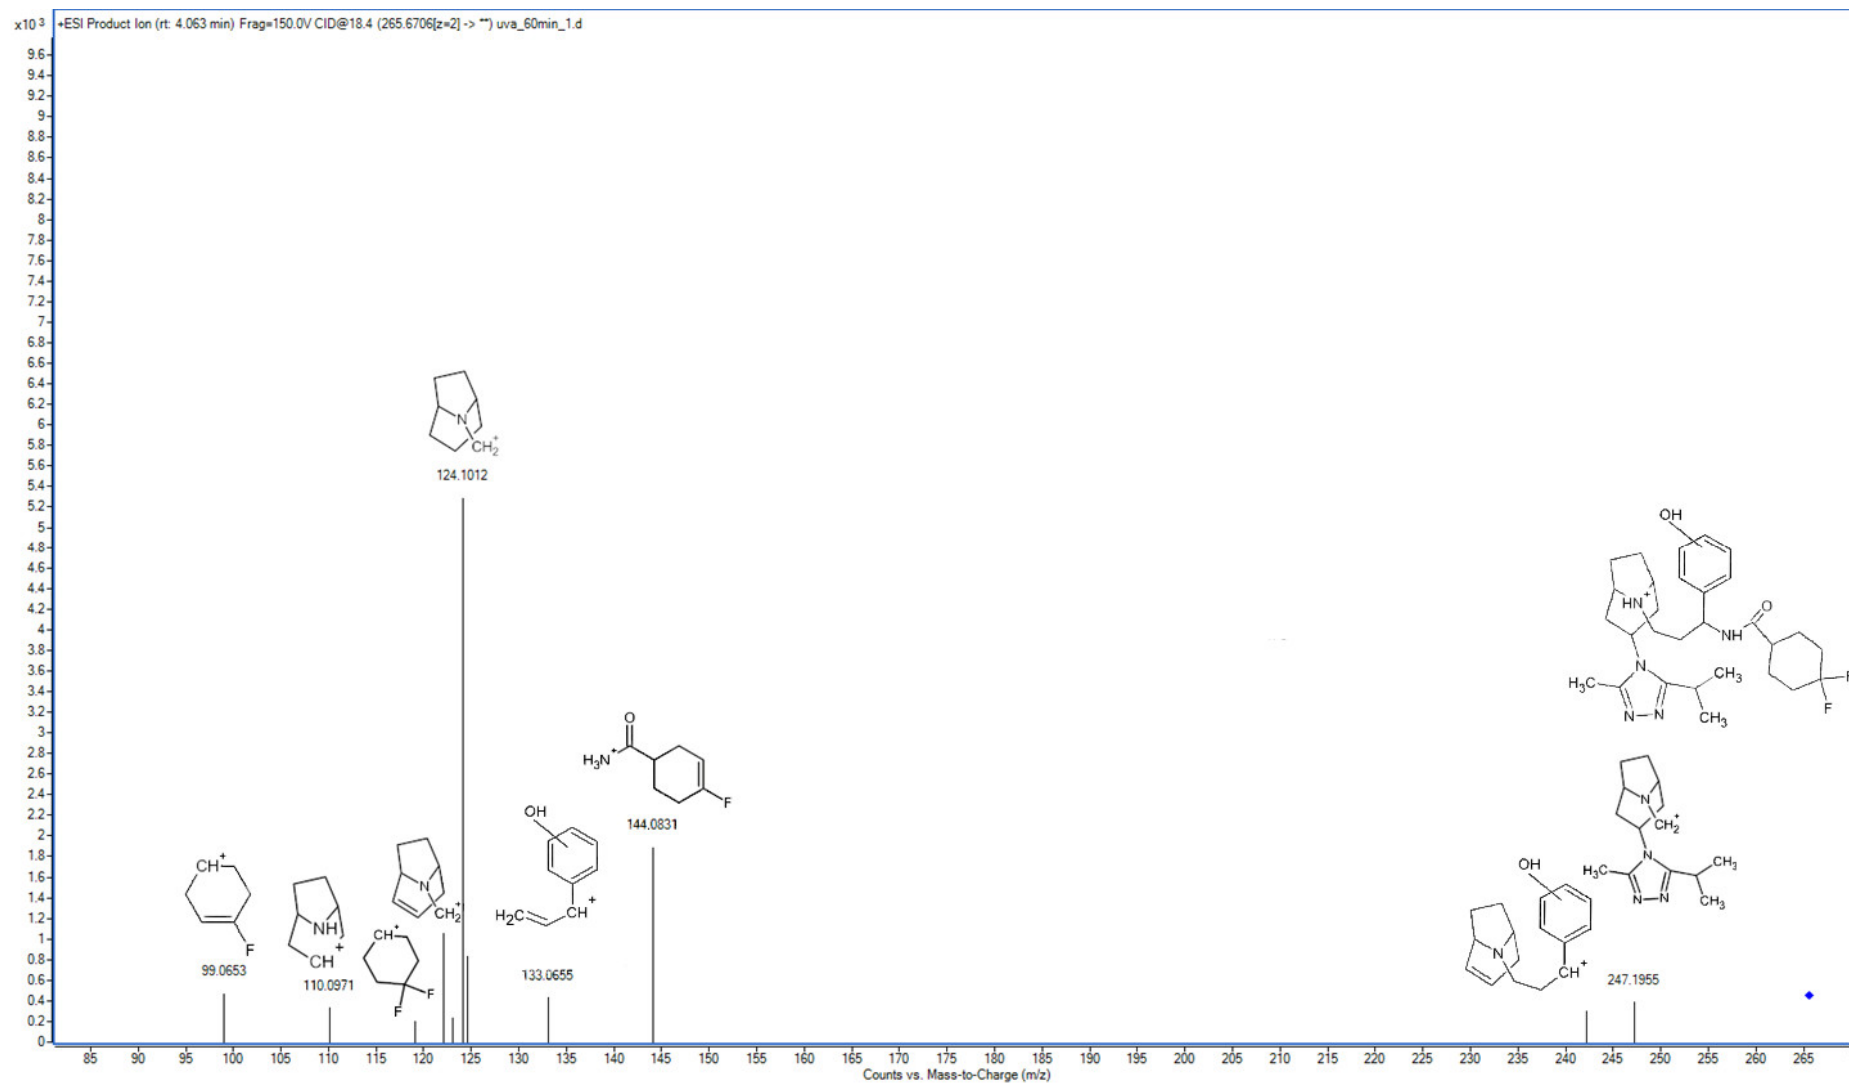

Figure S10. MS/MS spectrum and fragmentation pattern of double-charged TP5.

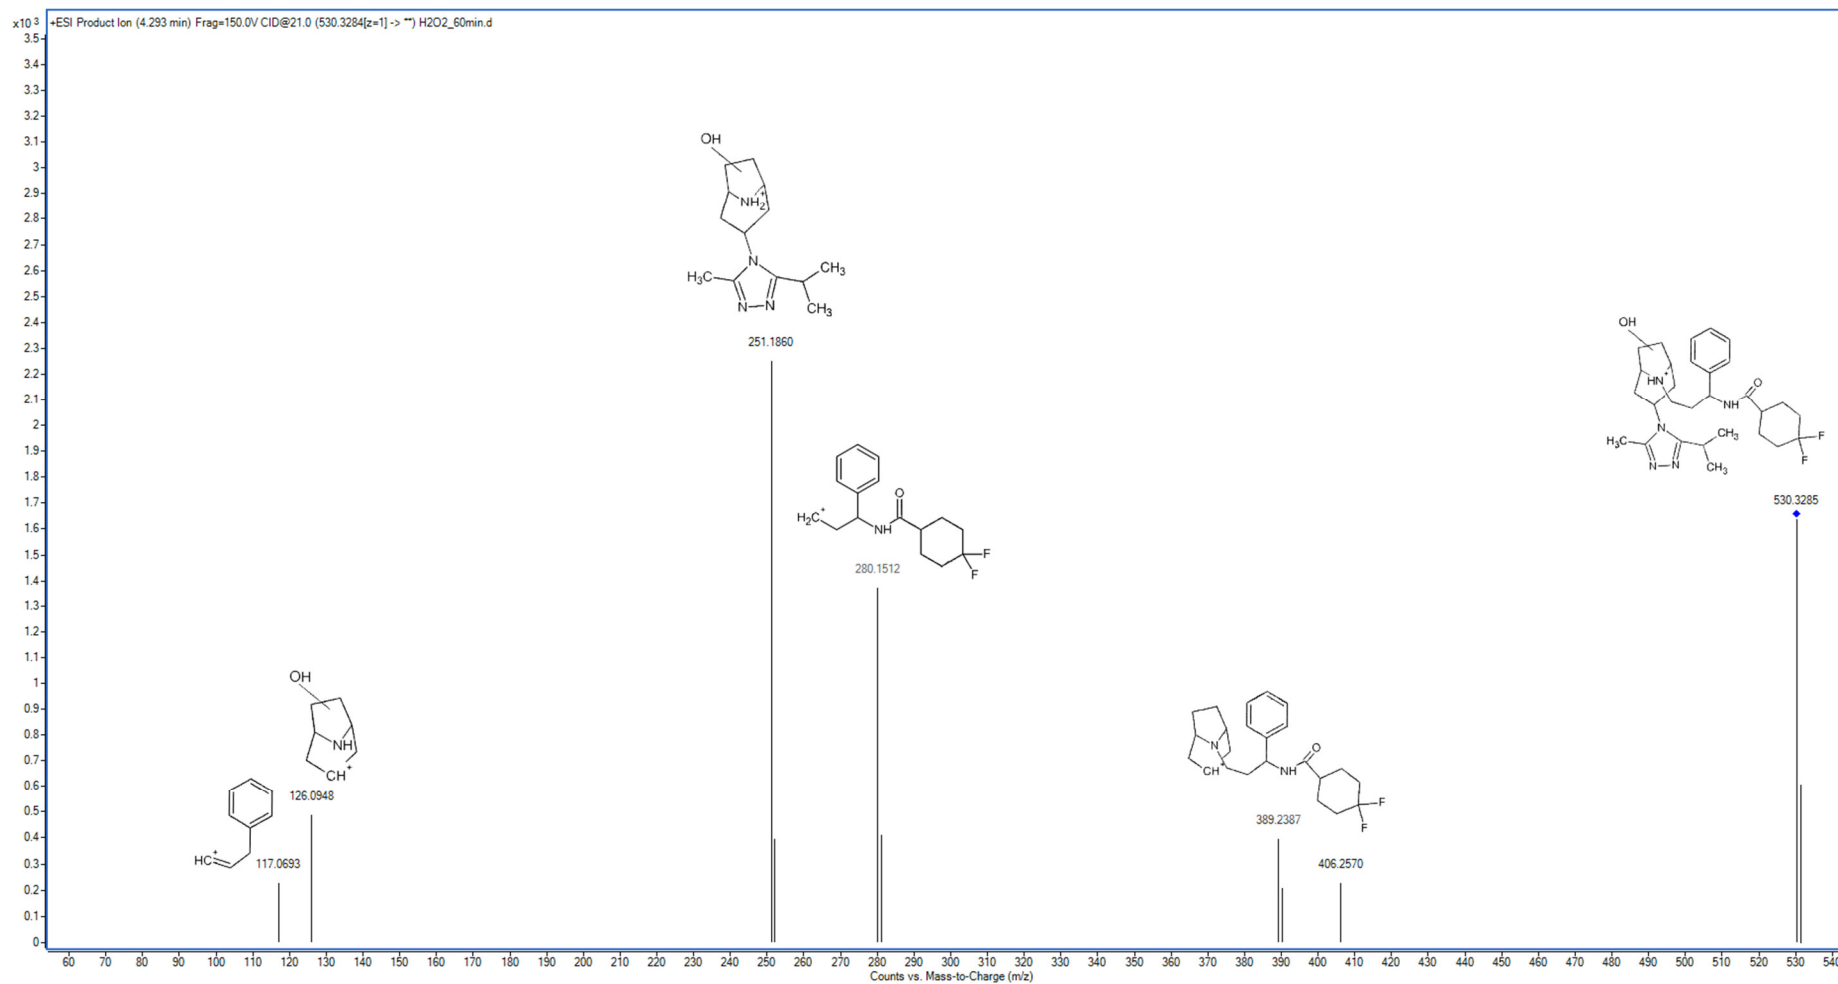

Figure S11. MS/MS spectrum and fragmentation pattern of single-charged TP6.

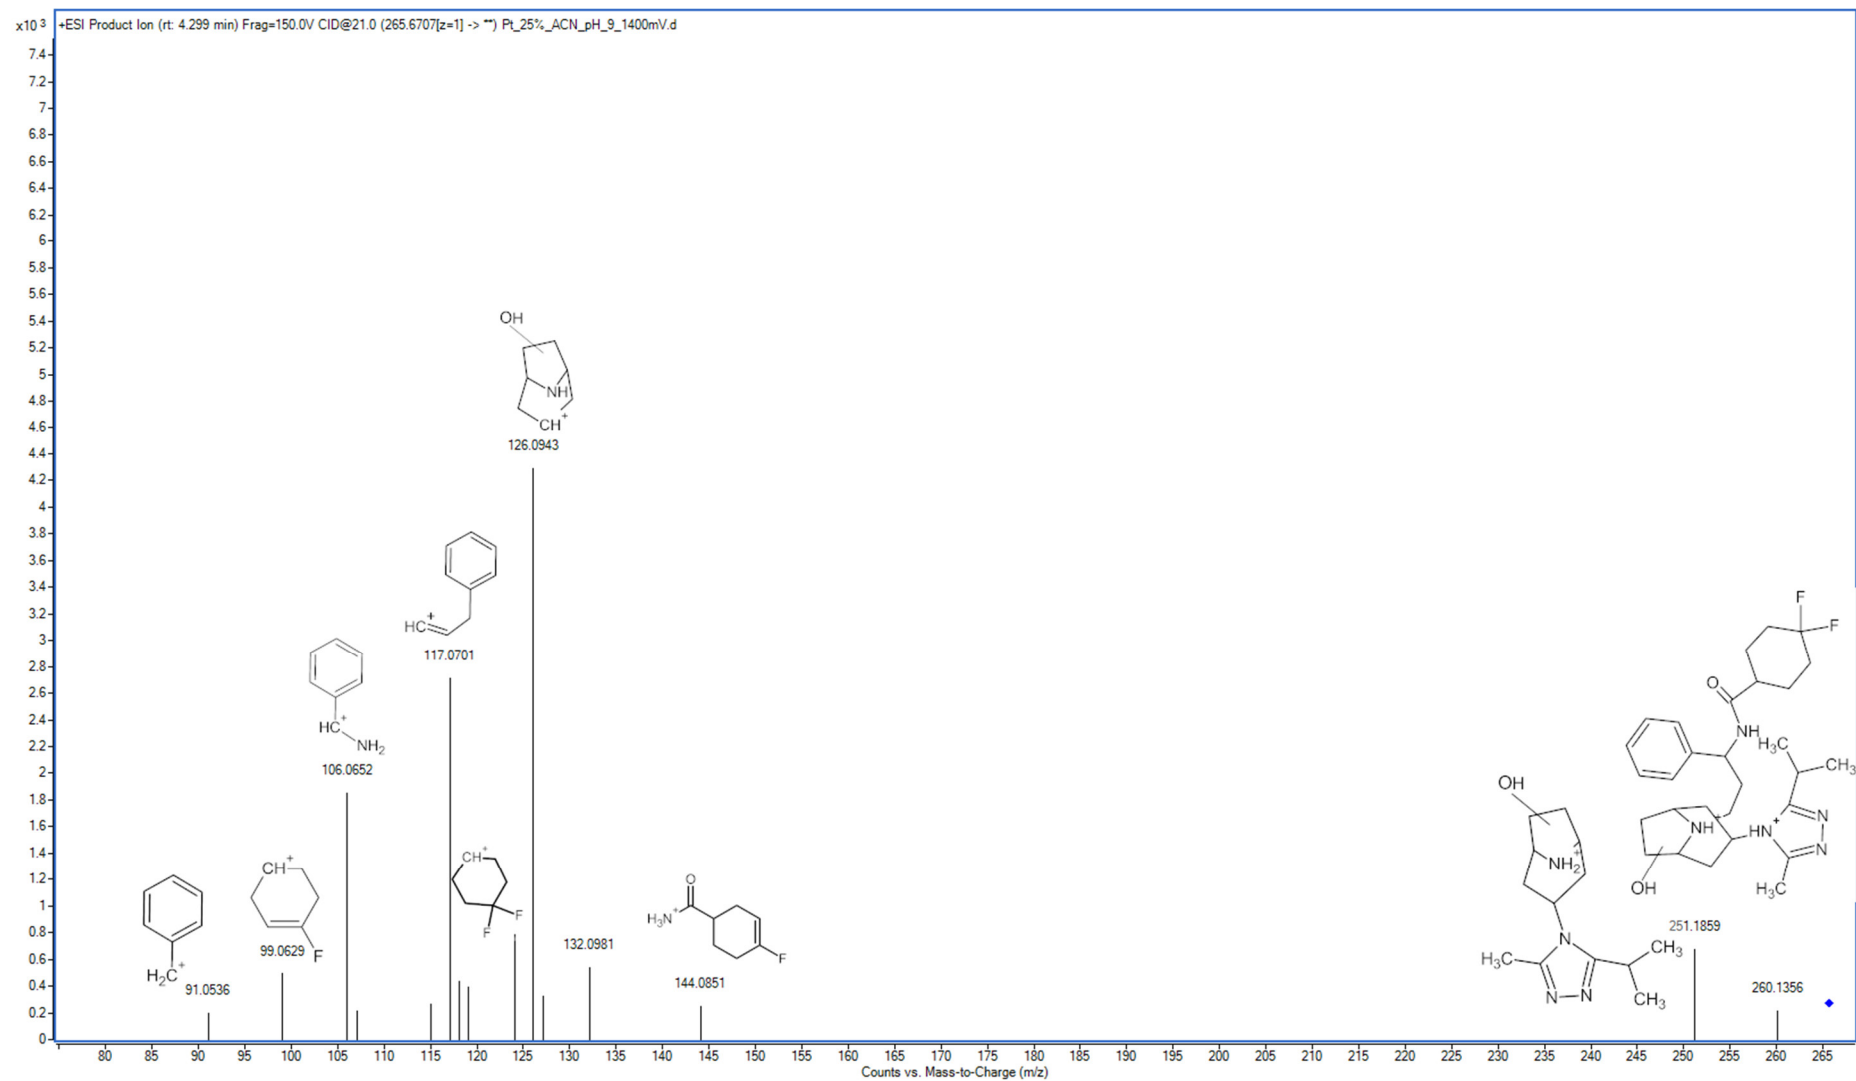

Figure S12. MS/MS spectrum and fragmentation pattern of double-charged TP6.

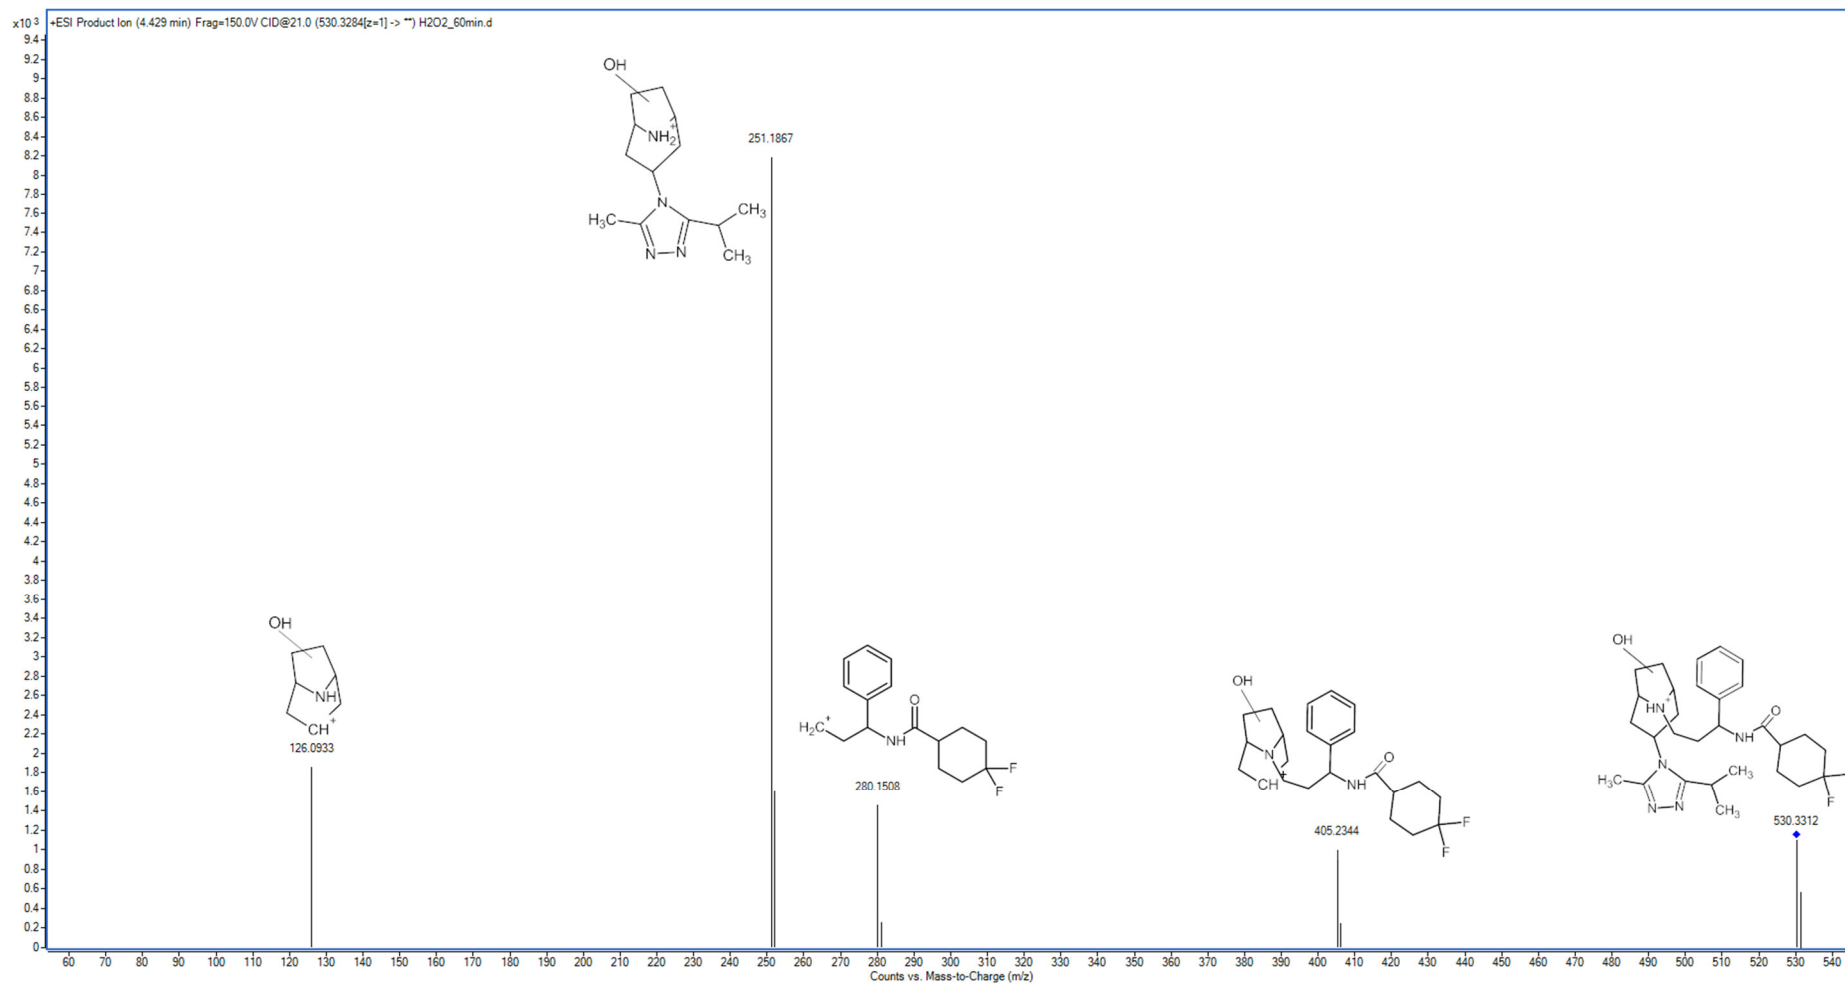

Figure S13. MS/MS spectrum and fragmentation pattern of single-charged TP7.

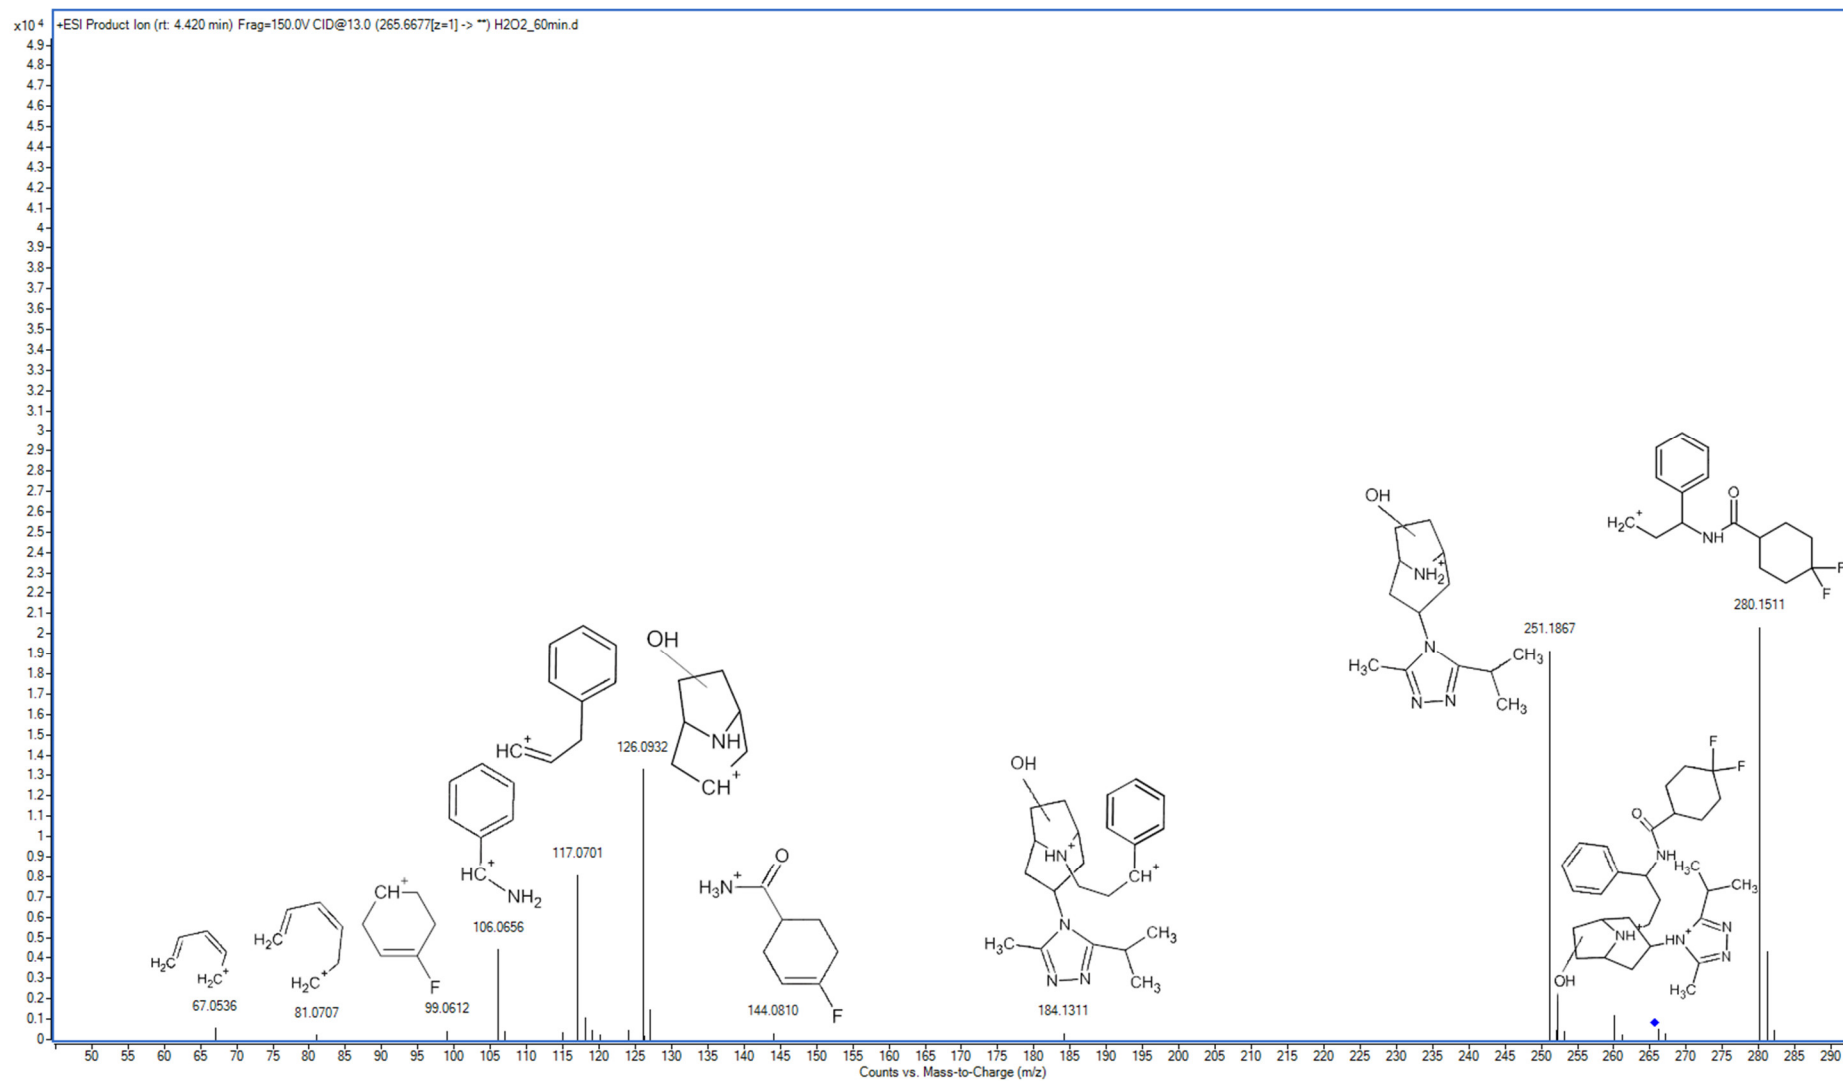

Figure S14. MS/MS spectrum and fragmentation pattern of double-charged TP7.

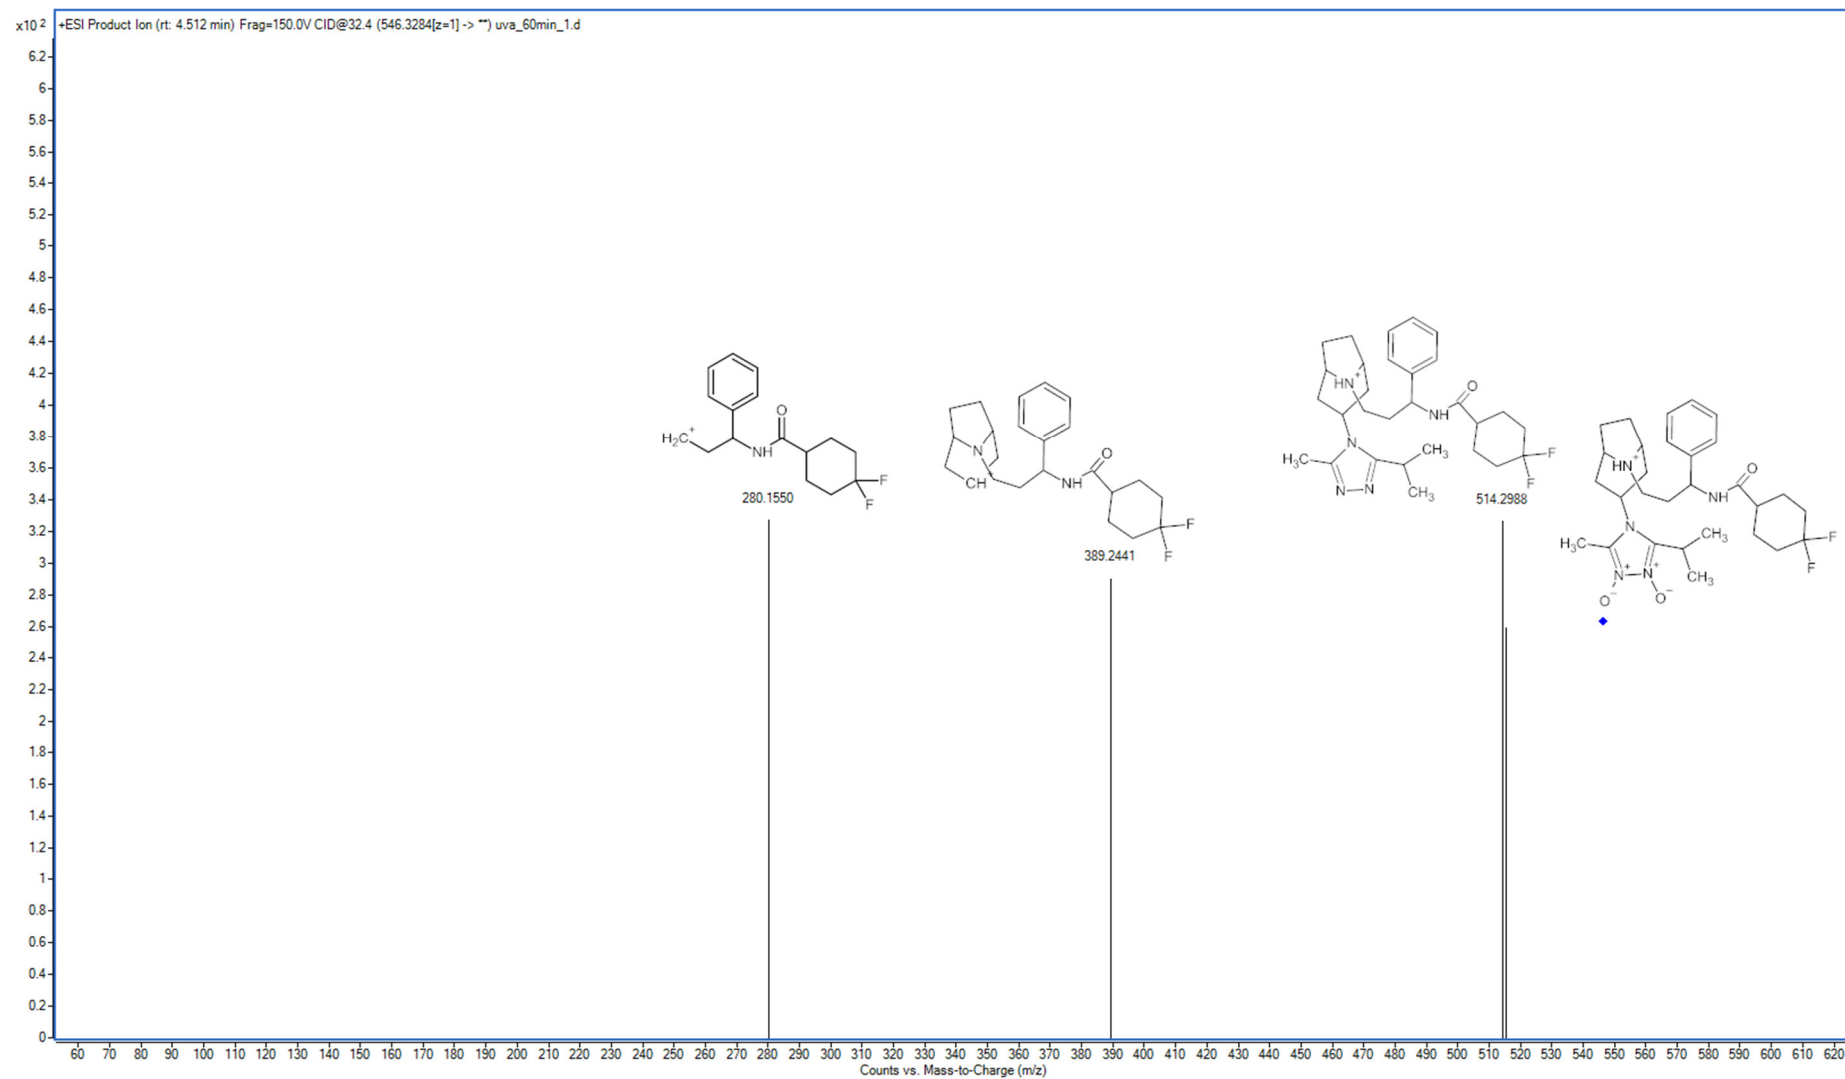

Figure S15. MS/MS spectrum and fragmentation pattern of single-charged TP8.



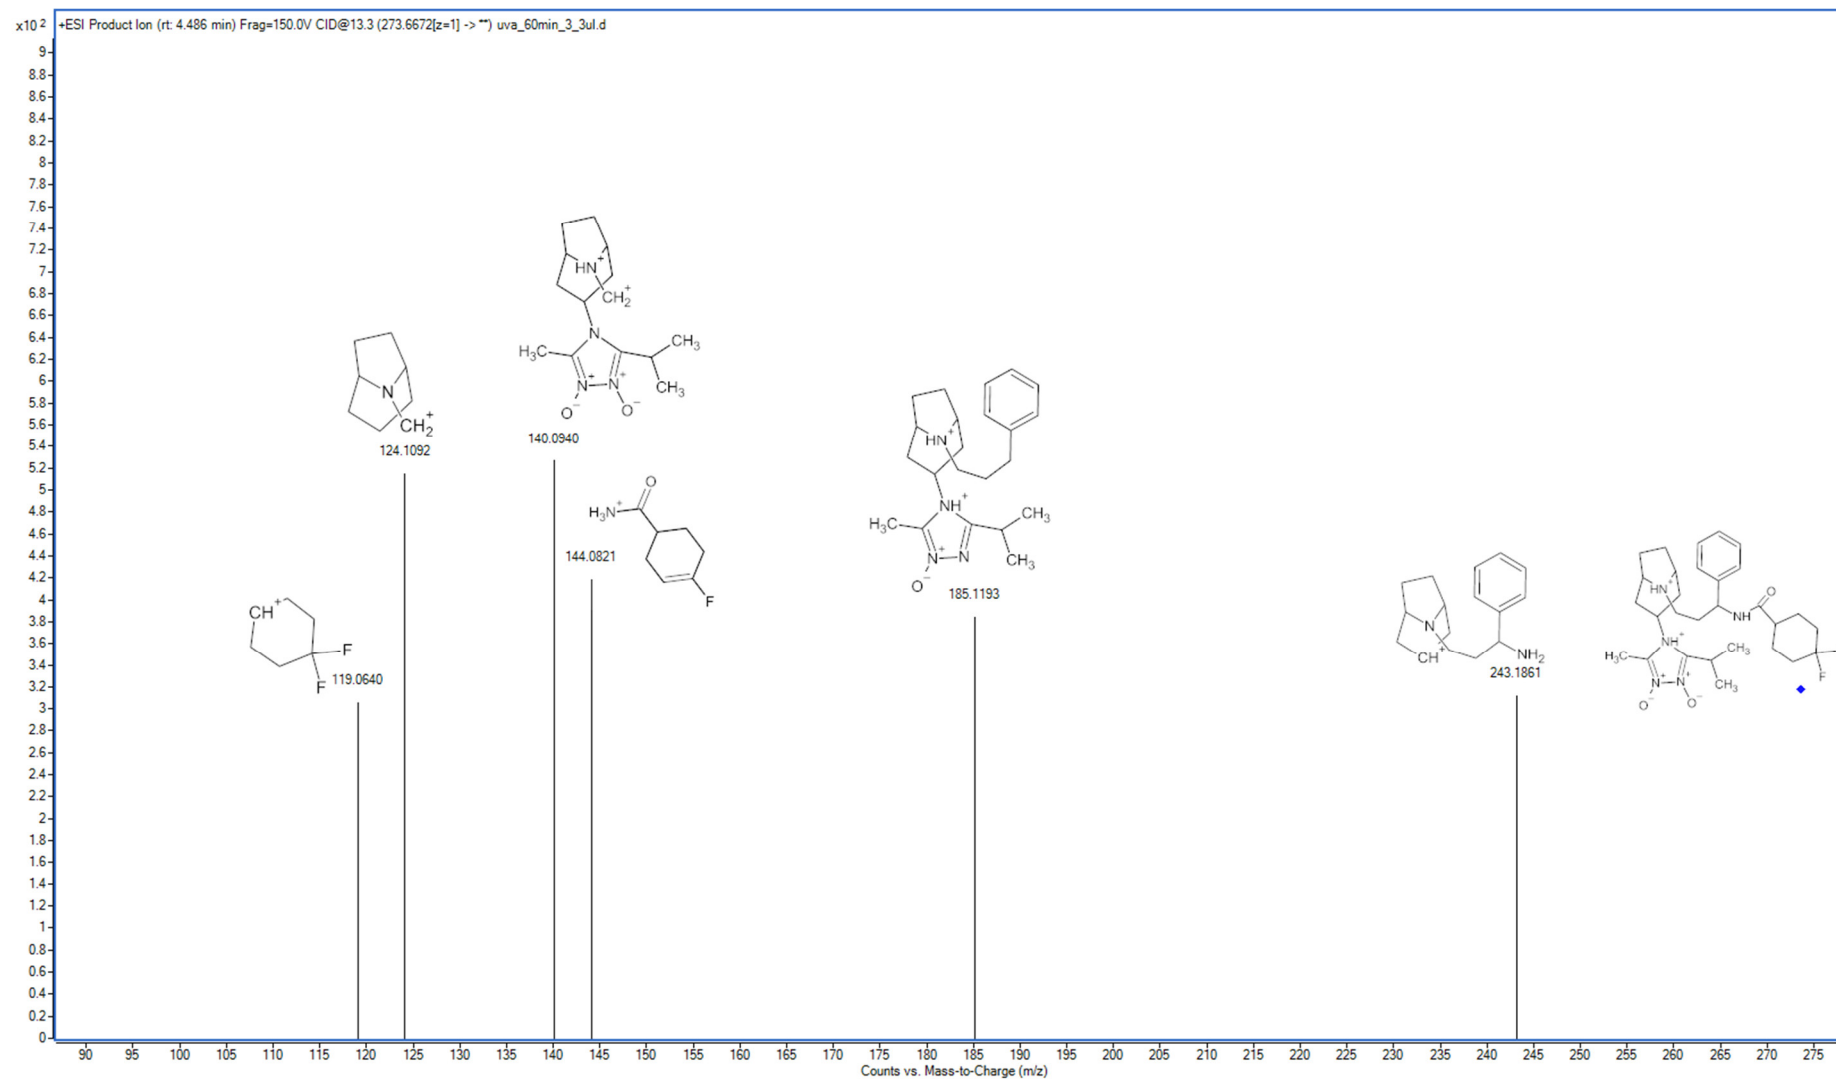

Figure S16. MS/MS spectrum and fragmentation pattern of double-charged TP8.
